# Supplementary material for: A checklist for identifying determinants of practice: A systematic review and synthesis of frameworks and taxonomies of factors that prevent or enable improvements in healthcare professional practice
Source: Implement Sci. 2013 Mar 23;8:35. doi: 10.1186/1748-5908-8-35 (PMC3617095; doi:10.1186/1748-5908-8-35)
Supplement: Additional file 2 — Feedback on TICD Checklist. [file 1748-5908-8-35-S2.pdf]

## Additional file 2 - Feedback on TICD Checklist

|                                                                                                                                                                                                                 |                                 |                                       |                                 |
|-----------------------------------------------------------------------------------------------------------------------------------------------------------------------------------------------------------------|---------------------------------|---------------------------------------|---------------------------------|
| <b>Name(s):</b>                                                                                                                                                                                                 |                                 |                                       |                                 |
| <b>Date:</b>                                                                                                                                                                                                    |                                 |                                       |                                 |
| <b>Comments (including explanations of perceived problems and suggestions for improvements)</b>                                                                                                                 |                                 |                                       |                                 |
| <b>Comprehensiveness</b>                                                                                                                                                                                        |                                 |                                       |                                 |
| 1. Are potentially important factors missing from the checklist?                                                                                                                                                | Yes<br><input type="checkbox"/> | Uncertain<br><input type="checkbox"/> | No<br><input type="checkbox"/>  |
| <b>Relevance</b>                                                                                                                                                                                                |                                 |                                       |                                 |
| 2. Are factors included in the checklist that should not be?                                                                                                                                                    | No<br><input type="checkbox"/>  | Uncertain<br><input type="checkbox"/> | Yes<br><input type="checkbox"/> |
| <b>Applicability</b>                                                                                                                                                                                            |                                 |                                       |                                 |
| 3. Is checklist applicable across different settings (e.g. primary and secondary care) and different types of practices (including prevention, diagnosis and treatment for chronic and non-chronic conditions)? | Yes<br><input type="checkbox"/> | Uncertain<br><input type="checkbox"/> | No<br><input type="checkbox"/>  |
| <b>Simplicity</b>                                                                                                                                                                                               |                                 |                                       |                                 |
| 4. Is the checklist more complicated than necessary?                                                                                                                                                            | No<br><input type="checkbox"/>  | Uncertain<br><input type="checkbox"/> | Yes<br><input type="checkbox"/> |
| <b>Logic</b>                                                                                                                                                                                                    |                                 |                                       |                                 |
| 5. Is the checklist organised in a logical way that is easy to understand?                                                                                                                                      | Yes<br><input type="checkbox"/> | Uncertain<br><input type="checkbox"/> | No<br><input type="checkbox"/>  |
| <b>Clarity</b>                                                                                                                                                                                                  |                                 |                                       |                                 |
| 6. Are the factors and domains (groups of factors) labelled and explained in a way that is easy to understand?                                                                                                  | Yes<br><input type="checkbox"/> | Uncertain<br><input type="checkbox"/> | No<br><input type="checkbox"/>  |
| <b>Usability</b>                                                                                                                                                                                                |                                 |                                       |                                 |
| 7. Would it be easy for implementation researchers to use the checklist and the worksheets?                                                                                                                     | Yes<br><input type="checkbox"/> | Uncertain<br><input type="checkbox"/> | No<br><input type="checkbox"/>  |
| 8. Would it be easy for people who are not implementation researchers to use the checklist and worksheets?                                                                                                      | Yes<br><input type="checkbox"/> | Uncertain<br><input type="checkbox"/> | No<br><input type="checkbox"/>  |
| <b>Suitability</b>                                                                                                                                                                                              |                                 |                                       |                                 |
| 9. Are the checklist and worksheets suitable for helping people to identify and prioritise determinants of change in practice that should be considered when designing implementation strategies?               | Yes<br><input type="checkbox"/> | Uncertain<br><input type="checkbox"/> | No<br><input type="checkbox"/>  |
| <b>Usefulness</b>                                                                                                                                                                                               |                                 |                                       |                                 |
| 10. Are the checklist and worksheets likely to be useful to people designing implementation strategies?                                                                                                         | Yes<br><input type="checkbox"/> | Uncertain<br><input type="checkbox"/> | No<br><input type="checkbox"/>  |
| 11. Is the checklist likely to be useful for reporting determinants of practice in research reports?                                                                                                            | Yes<br><input type="checkbox"/> | Uncertain<br><input type="checkbox"/> | No<br><input type="checkbox"/>  |

|                           |                                                                                                                    | Comments (including explanations of perceived problems and suggestions for improvements) |                          |                          |
|---------------------------|--------------------------------------------------------------------------------------------------------------------|------------------------------------------------------------------------------------------|--------------------------|--------------------------|
| <b>Overall assessment</b> |                                                                                                                    | Yes                                                                                      | Partially                | No                       |
| 12.                       | Overall, are the checklist and worksheets adequate to be used to identify and prioritise determinants of practice? | <input type="checkbox"/>                                                                 | <input type="checkbox"/> | <input type="checkbox"/> |
|                           |                                                                                                                    | See explanation below.                                                                   |                          |                          |
| <b>Strengths</b>          |                                                                                                                    |                                                                                          |                          |                          |
| 13.                       | What do you like about the checklist and worksheets?                                                               |                                                                                          |                          |                          |
| <b>Weaknesses</b>         |                                                                                                                    |                                                                                          |                          |                          |
| 14.                       | What don't you like about the checklist and worksheets and what suggestions do you have for improving them?        |                                                                                          |                          |                          |
| <b>Anything else</b>      |                                                                                                                    |                                                                                          |                          |                          |
| 15.                       | Please include any other comments you have regarding the checklist or worksheets.                                  |                                                                                          |                          |                          |

### Overall assessment

Yes = Could be used as is with little or no modification

Partially = Needs some modification or further development

No = Not adequate
